# Supplementary material for: A Sodium Leak Current Regulates Pacemaker Activity of Adult Central Pattern Generator Neurons in Lymnaea Stagnalis
Source: PubMed Central journal article supplement (PMC3079709; doi:10.1371/journal.pone.0018745), 2011-04-19
Supplement: pone.0018745.s001.pdf [file pone.0018745.s001.pdf]

## Supplement materials

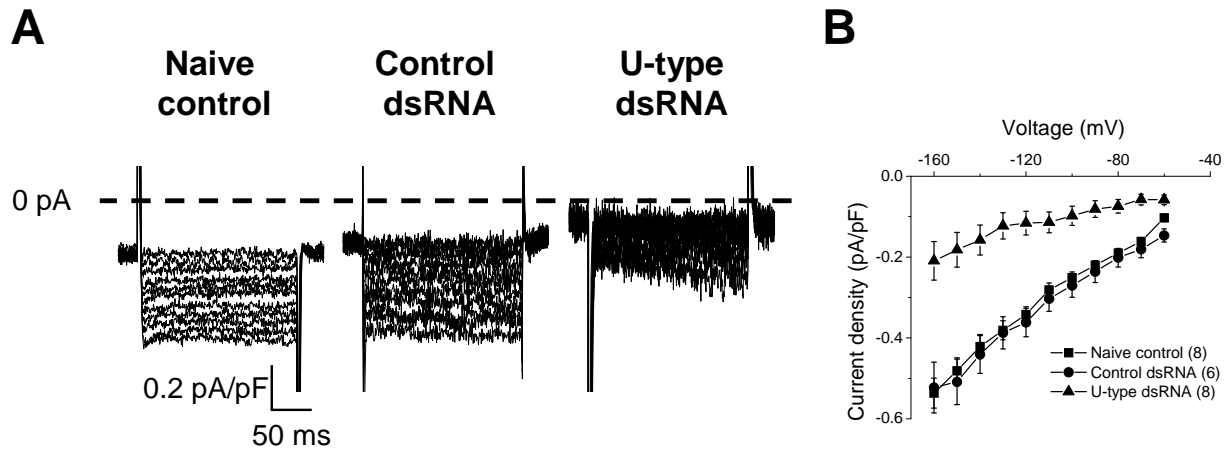

**Figure S1. Partial knockdown of U-type channel reduces inward hyperpolarizing  $\text{Na}^+$  current in RPeD1 neurons.** (A) Representative  $\text{Na}^+$  current generated by subtracting the current obtained in  $\text{Na}^+$  free condition from that in saline from RPeD1 neurons in naive control, control dsRNA, and U-type dsRNA treatments (from the data presented in Figure 5B). (B) Average  $I_{\text{Na}}$  density-voltage (I-V) relations of naive control ( $n = 8$ ), control dsRNA ( $n = 6$ ), and U-type dsRNA ( $n = 8$ ) treatment. U-type knockdown significantly reduces inward  $I_{\text{Na}}$  densities at all hyperpolarizing voltages ( $P < 0.05$ ).
